# Supplementary material for: Comprehensive Assessment of Pharmacokinetics, Pharmacodynamics, and Tolerability of Ligelizumab in Healthy Volunteers and Patients with Chronic Spontaneous Urticaria to Optimize Its Subcutaneous Delivery System
Source: MDPI journal article supplement (doi:10.3390/pharmaceutics15092266), 2023-09-01
Supplement: s1 [file s1]

**Table S1. Cross-study comparison of % change from baseline in total IgE in CSU patients during steady state following Q4W subcutaneous doses of 120 mg ligelizumab administered as LIVI or PFS formulation**

| Studies | Formulation | Dose                                      | Timepoint | N   | % change from baseline<br>Mean (CV%) |
|---------|-------------|-------------------------------------------|-----------|-----|--------------------------------------|
| C2302   | LIVI        | 120 mg                                    | Week 24   | 203 | 184 (148.0)                          |
|         |             |                                           | Week 52   | 269 | 158 (127)                            |
| C2303   | LIVI        | 120 mg                                    | Week 24   | 192 | 193 (84.3)                           |
|         |             |                                           | Week 52   | 262 | 158 (112)                            |
| C2302E1 | PFS         | 120 mg self-administration<br>by patients | Week 24   | 295 | 143 (104)                            |
|         |             |                                           | Week 52   | 63  | 125 (96.2)                           |
|         |             | 120 mg in-clinic<br>staff administration  | Week 24   | 220 | 139 (99.8)                           |
|         |             |                                           | Week 52   | 55  | 136 (131)                            |

LIVI: Ligelizumab 120 mg/1 mL liquid-in-vial (reference formulation).

PFS: Ligelizumab 120 mg/1 mL prefilled syringe (test formulation).

Q4W: once every 4 weeks.

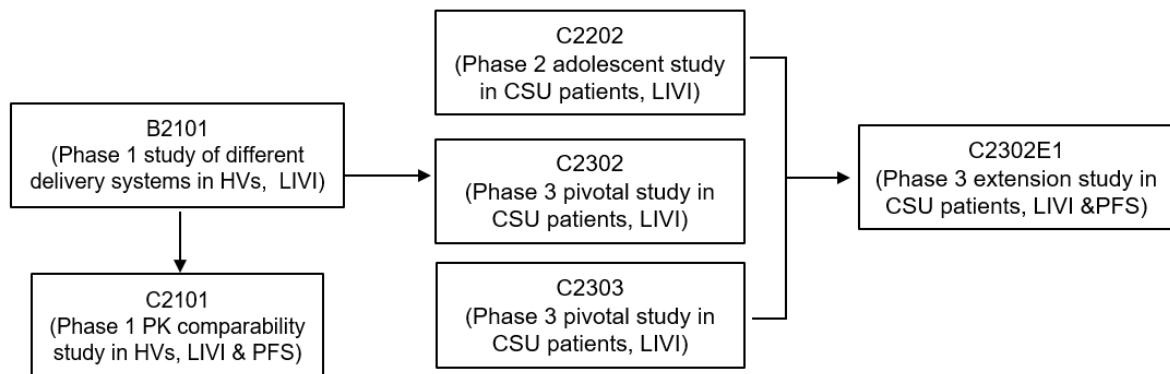

**Figure S1: Clinical studies of ligelizumab in healthy volunteers (HVs) and CSU patients included in the assessment and optimization of its delivery system**

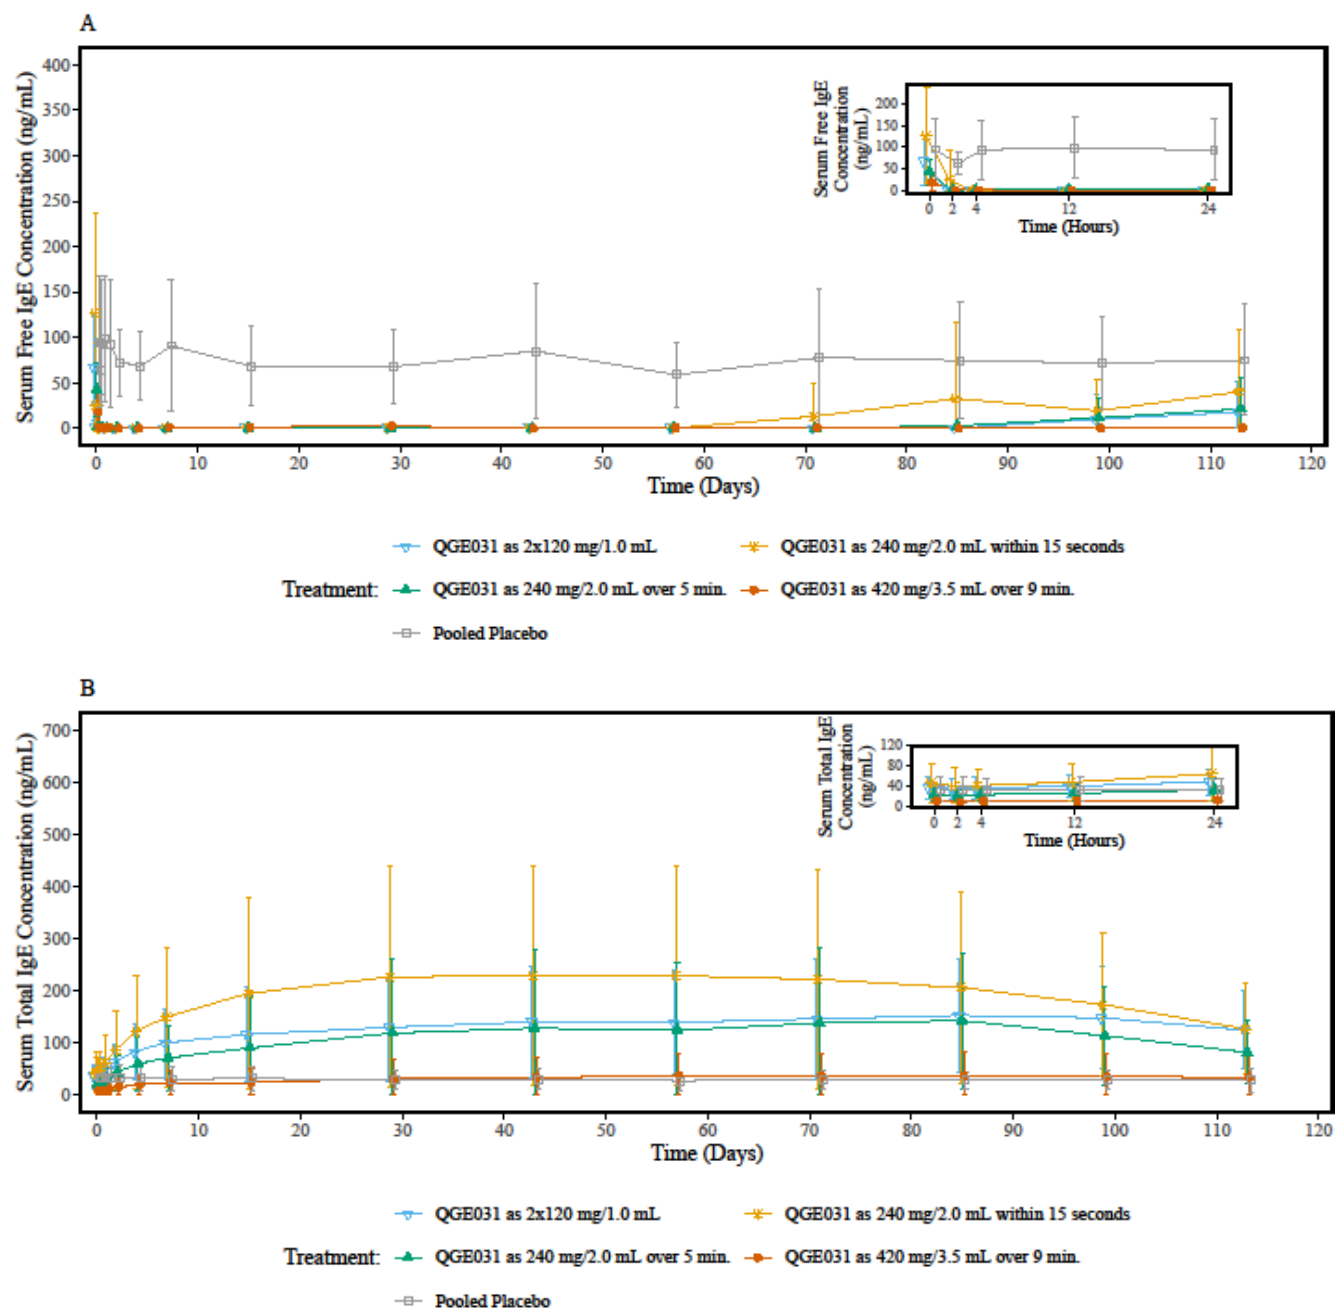

Figure S2: Arithmetic mean ( $\pm$ SD) concentration–time profiles of serum free IgE (A) and total IgE (B) following a single subcutaneous dose of ligelizumab (QGE031), administered via different delivery systems of the LIVI formulation in healthy volunteers.

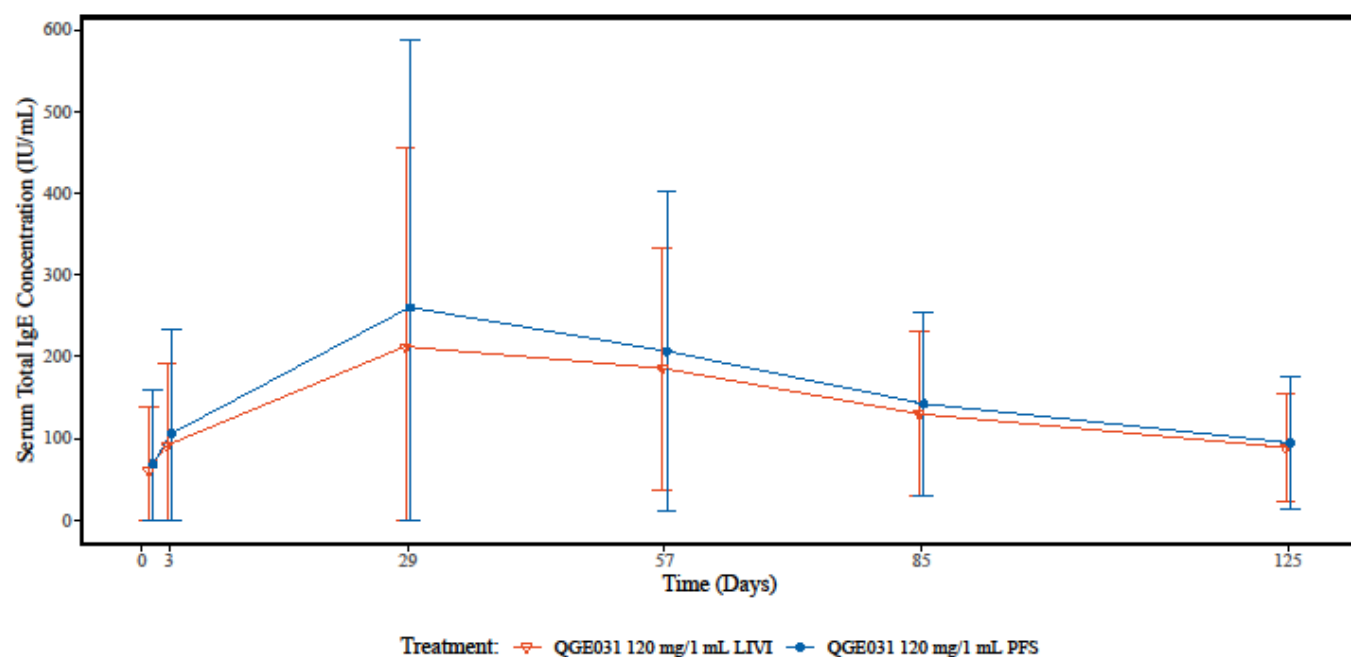

Figure S3: Arithmetic mean ( $\pm$ SD) concentration–time profiles of serum total IgE following a single subcutaneous dose of 120 mg of ligelizumab (QGE031), administered as a LIVI or PFS in healthy volunteers.

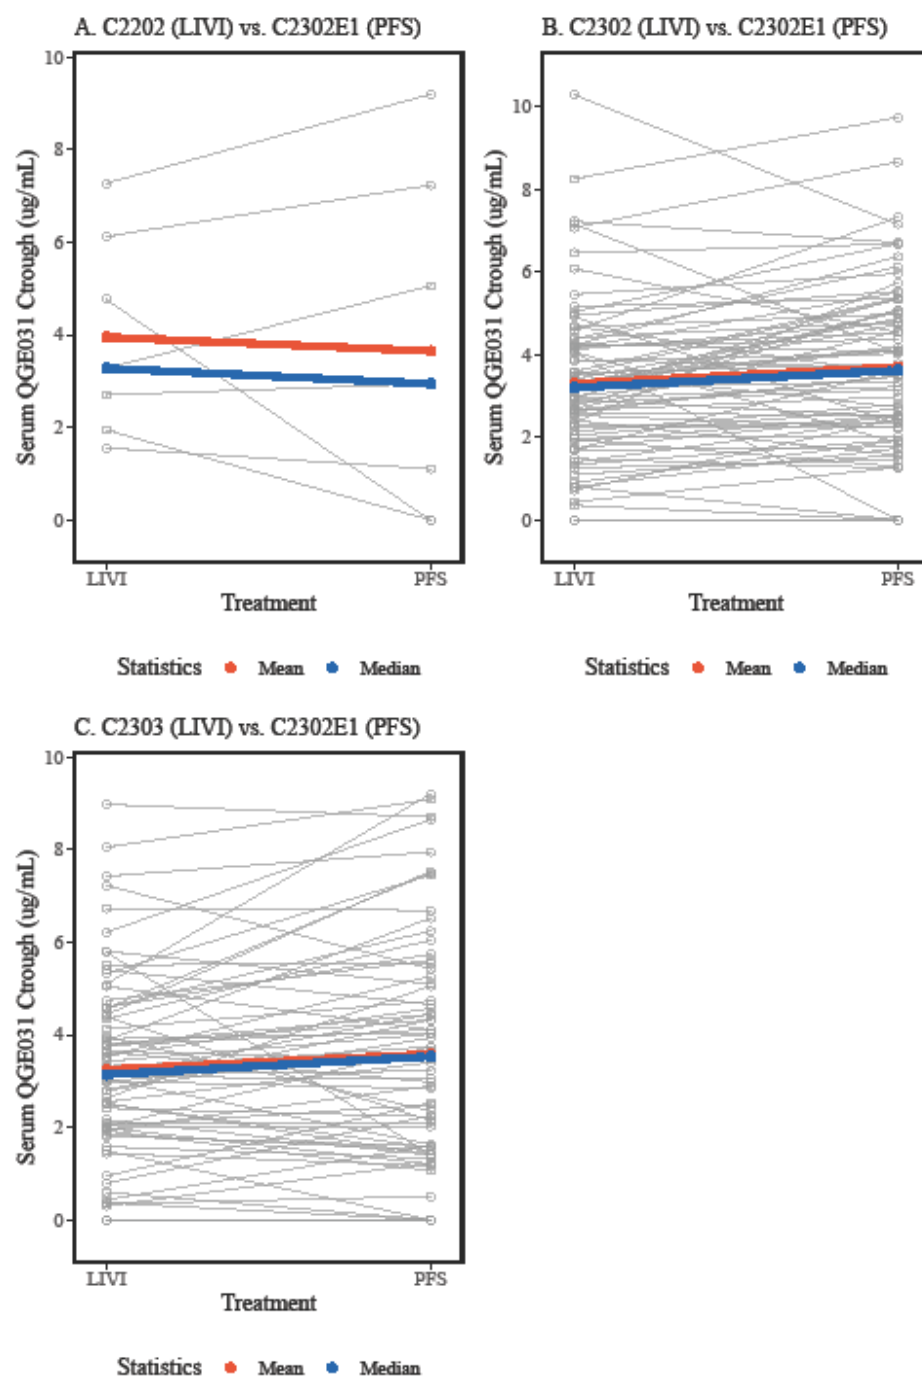

Figure S4: Intra-subject comparison of steady-state ligelizumab (QGE031) Ctrough between the core studies (C2202, C2302, and C2303; LIVI) and the extension study (C2302E1; PFS) following Q4W subcutaneous doses of 120 mg of ligelizumab, administered as a LIVI or PFS formulation in patients with CSU.
